# Supplementary material for: pH- and concentration-dependent supramolecular self-assembly of a naturally occurring octapeptide
Source: publisher site journal article supplement (doi:10.3762/bjoc.16.168), 2020-08-17
Supplement: Additional file 1 [file 1860-5397-16-168-S1.pdf]

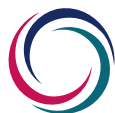

## Supporting Information

for

### **pH- and concentration-dependent supramolecular self-assembly of a naturally occurring octapeptide**

Goutam Ghosh and Gustavo Fernández

*Beilstein J. Org. Chem.* **2020**, *16*, 2017–2025. [doi:10.3762/bjoc.16.168](https://doi.org/10.3762/bjoc.16.168)

**Materials and methods as well as additional figures**

## Materials and methods

Rink amide resin (Rink amide 4-methylbenzhydrylamine, polymer-bound), Fmoc-protected amino acids, *O*-(benzotriazol-1-yl)-*N,N,N,N*-tetramethyluronium hexafluorophosphate (HBTU), triisopropylsilane (TIPS), trifluoroacetic acid (TFA), and *N*-methylmorpholine (NMM), were purchased from Sigma-Aldrich. Ninhydrin, dimethylformamide (DMF), dichloromethane (DCM), phenol, piperidine, and pyridine were purchased from Merck. All solvents were distilled and dried following standard protocols before use. [1] Reversed-phase high-performance liquid chromatography (RP-HPLC) was done with a Waters HPLC (2489 UV–vis detector) system. An applied Biosystems 4700 Proteomics Analyzer 170 MALDI-TOF mass spectrometer was used to determine the molecular mass of the peptide. Circular dichroism (CD) experiments were performed on a J1500 spectrophotometer from JASCO. FTIR spectra were recorded by using a PerkinElmer Spectrum 100FTIR spectrometer.

## Additional figures

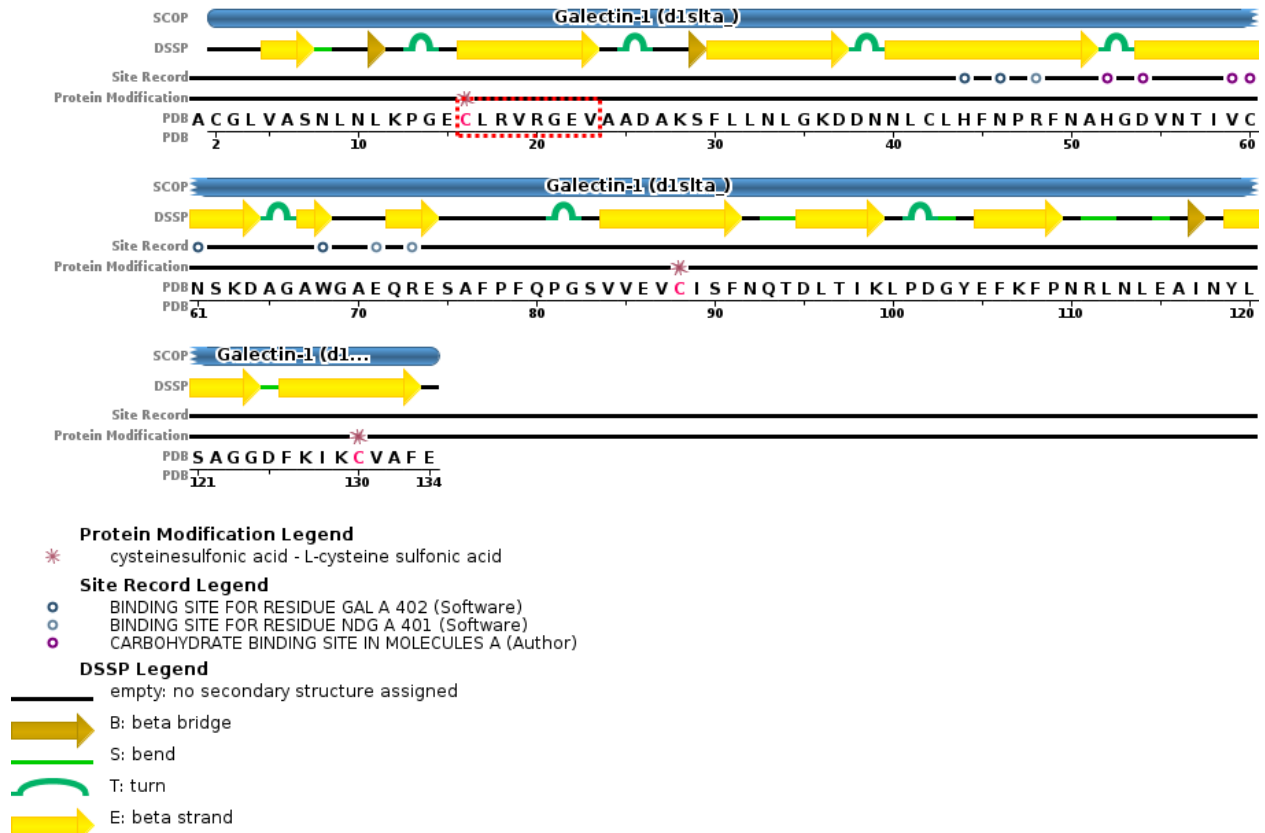

**Figure S1:** Amino acid sequence of galectin-1 from the crystal structure (the red dotted box indicates the PEP-1 sequence). Image from the RCSB PDB (rcsb.org); PDB ID: 1SLT.

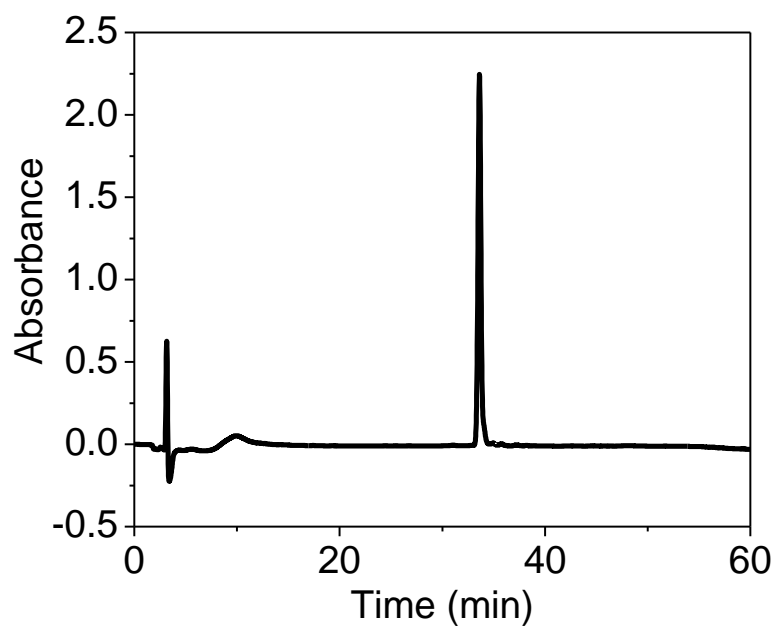

**Figure S2:** Reversed-phase HPLC chromatogram of purified PEP-1.

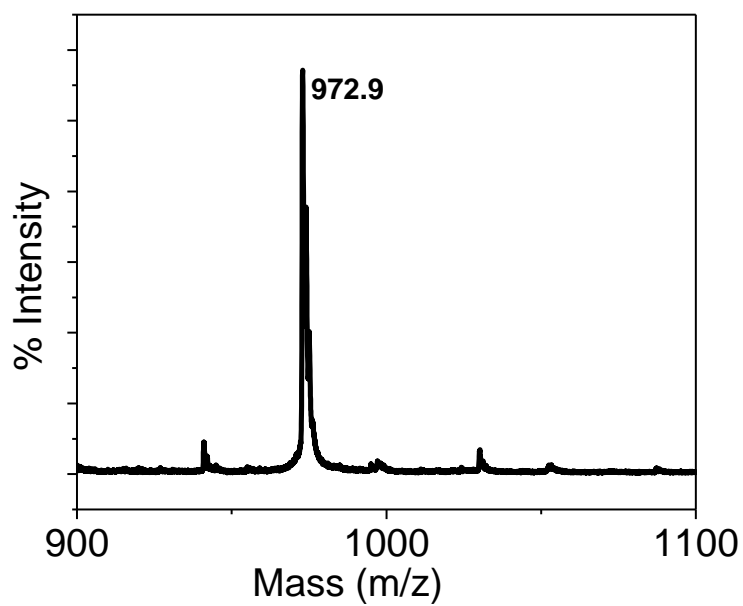

**Figure S3:** MALDI-TOF mass spectrum of purified PEP-1.

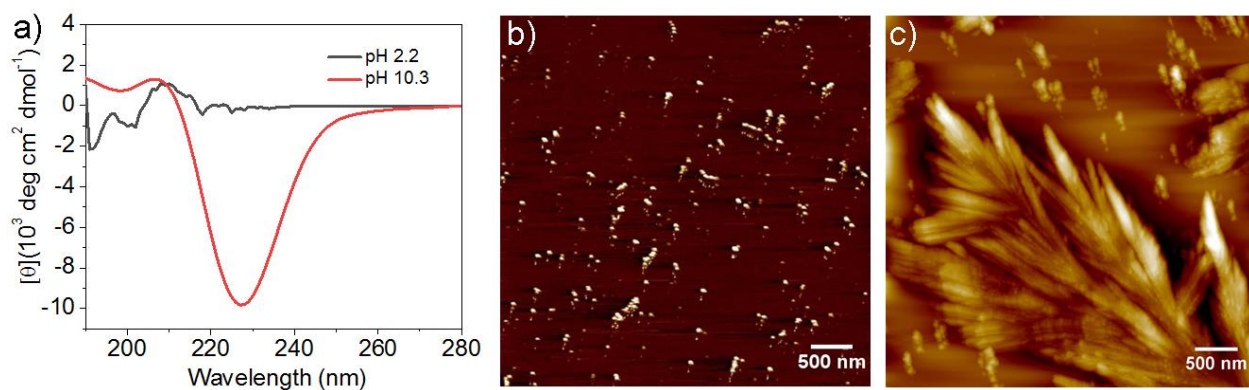

**Figure S4:** a) CD spectra at pH 2.2 and 10.3, respectively. b) AFM images of PEP-1 at pH 2.2 and c) pH 10.3 ( $c = 5 \times 10^{-4}$  M,  $T = 25$  °C).

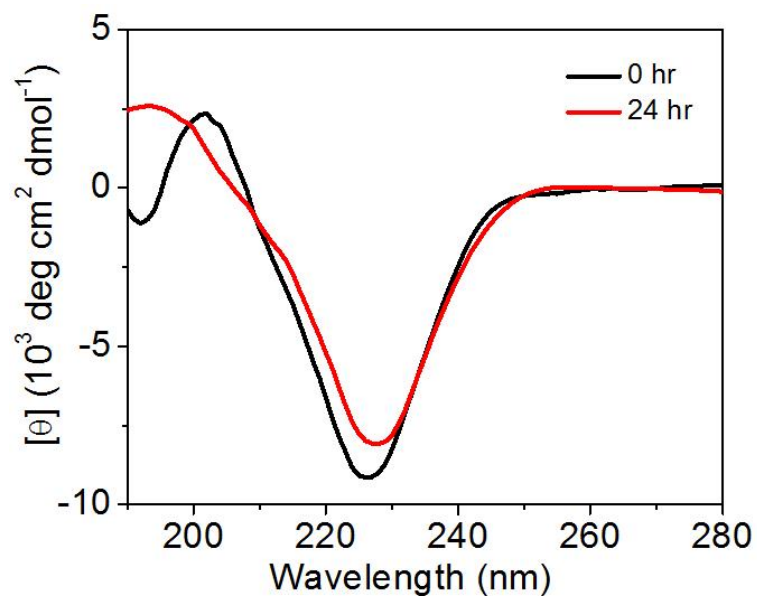

**Figure S5:** Time-dependent CD spectra of PEP-1 at pH 7.4 (PBS buffer;  $c = 5 \times 10^{-4}$  M,  $T = 25$  °C).

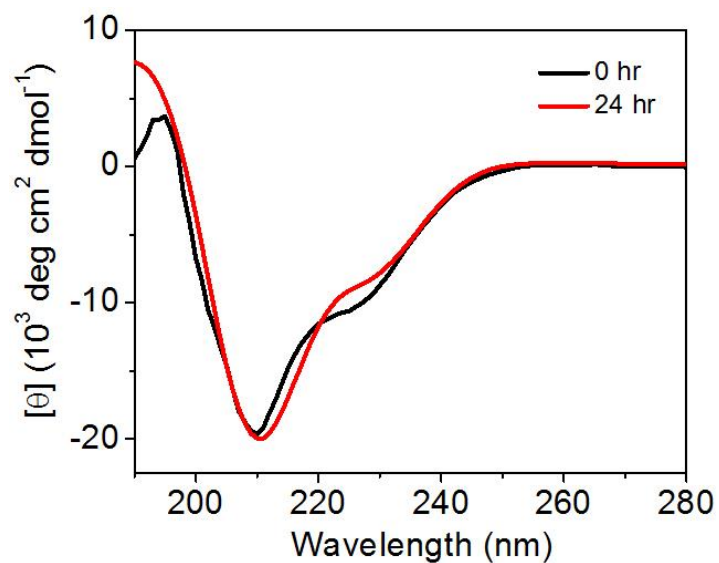

**Figure S6:** Time-dependent CD spectra of PEP-1 at pH 7.4 (PBS buffer;  $c = 1.25 \times 10^{-4}$  M,  $T = 25$  °C).

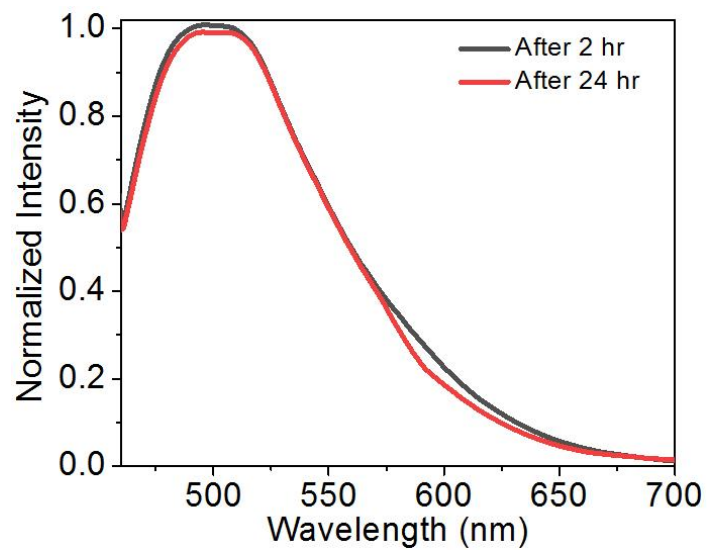

**Figure S7:** Time-dependent ThT assay of PEP-1 at pH 7.4 (PBS buffer;  $c = 5 \times 10^{-4}$  M,  $T = 25$  °C).

## References

1. Perrin, D.; Armarego, W. L. F.; Perrin, D. R. Purification of Laboratory Chemicals, 2nd ed., Pergamon, Oxford, 1980.
